# Supplementary material for: Preparation and Chemical/Microstructural Characterization of Azacrown Ether-Crosslinked Chitosan Films
Source: MDPI journal article supplement (doi:10.3390/ma10040400), 2017-04-11
Supplement: s1 [file s1]

# Supplementary Materials: Preparation and Chemical/Microstructural Characterization of Azacrown Ether-Crosslinked Chitosan Films

Julius Toeri, Anayancy Osorio-Madrado and Marie-Pierre Laborie

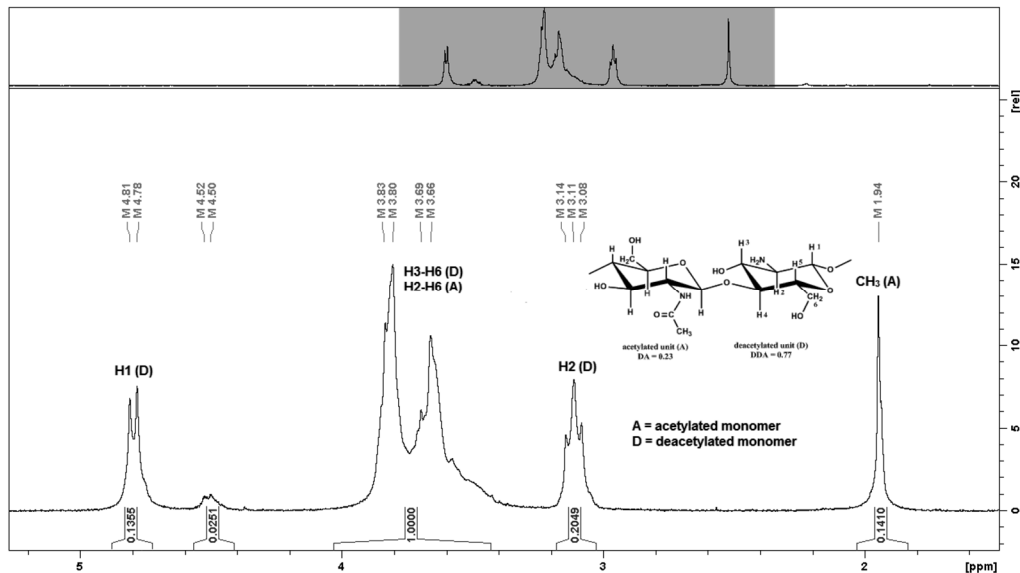

**Figure S1.** Proton NMR spectrum of chitosan with DA = 23% used in this study.

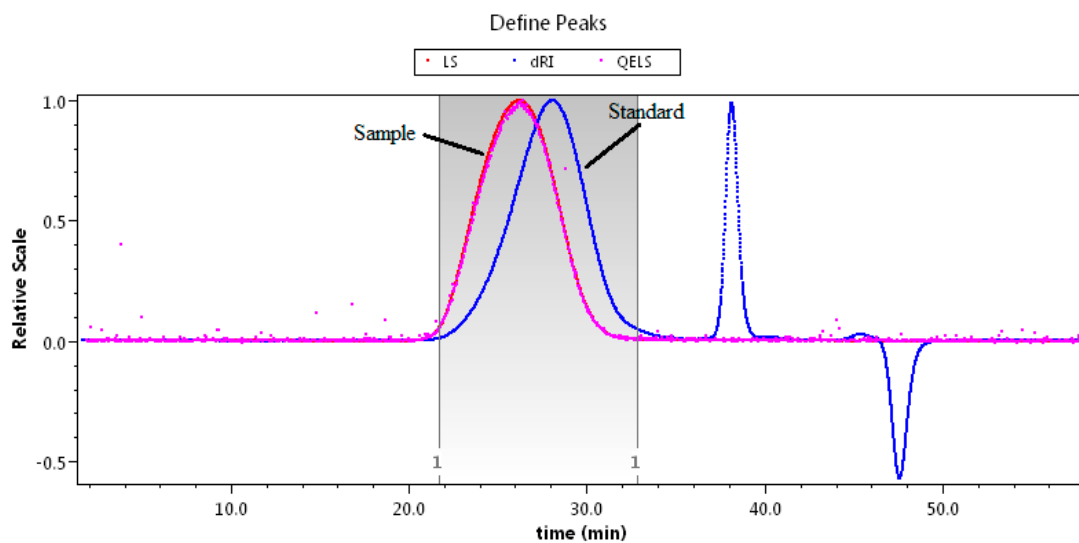

**Figure S2.** Size Exclusion chromatography/multiangle scattering (SEC/MALLS) spectrum obtained to calculate the weight- and number-average molecular weight and polydispersity index.

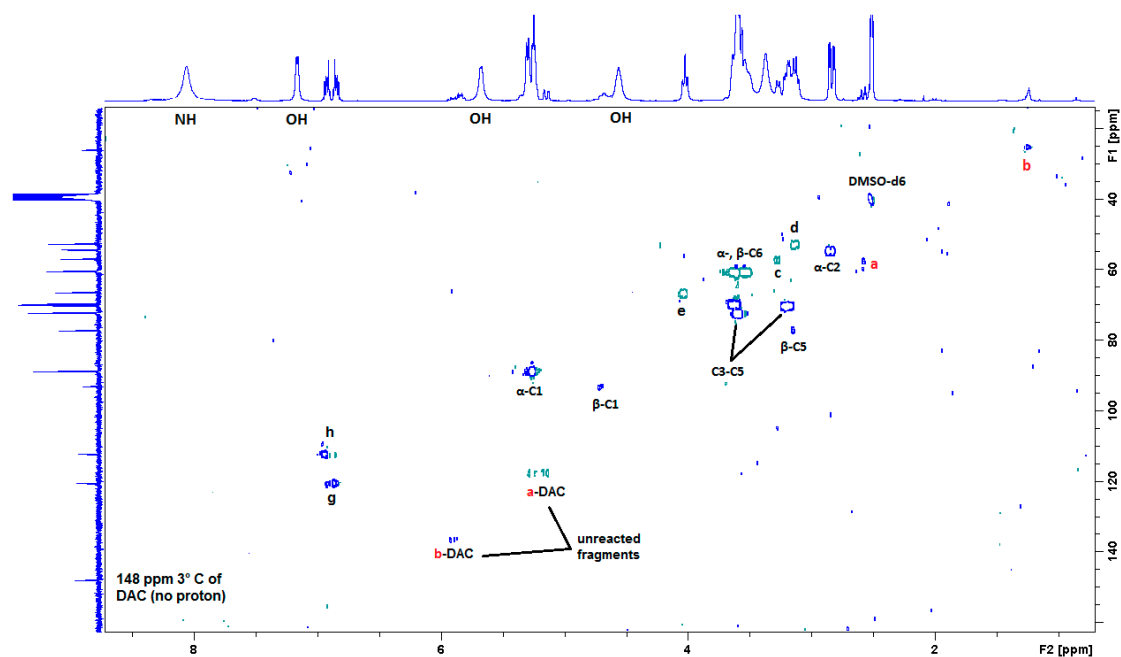

Figure S3. The HSQC spectrum for assigning the carbon signals with their corresponding protons.

Table S1. Elemental Analysis data for Ch-DAC hydrogel films.

| Compound       | [Ch] | [DAC] | Elemental analysis |      |      |       |        |
|----------------|------|-------|--------------------|------|------|-------|--------|
|                |      |       | C%                 | H%   | N%   | O%    | C/N    |
| Ch-DAC (0)     | 1.0  | 0     | 42.78              | 7.49 | 7.92 | 41.81 | 6.297  |
| Ch-DAC (0.125) | 1.0  | 0.125 | 44.51              | 7.12 | 8.15 | 40.22 | 6.372  |
| Ch-DAC (0.167) | 1.0  | 0.167 | 47.85              | 6.97 | 7.15 | 38.03 | 7.808  |
| Ch-DAC (0.25)  | 1.0  | 0.25  | 51.34              | 7.08 | 7.18 | 34.4  | 8.342  |
| Ch-DAC (0.5)   | 1.0  | 0.5   | 55.33              | 7.13 | 6.44 | 31.1  | 10.024 |
| DAC            | -    | -     | 71.08              | 7.85 | 6.30 | 14.77 | 13.152 |

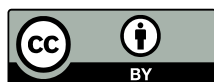

© 2017 by the authors. Submitted for possible open access publication under the terms and conditions of the Creative Commons Attribution (CC BY) license (<http://creativecommons.org/licenses/by/4.0/>).
